# Supplementary material
Source: PubMed Central journal article supplement (PMC4367964)
Supplement: NIHMS669495-supplement-Figs__S1_to_S4_Tables_S1_to_S11.pdf [file NIHMS669495-supplement-Figs__S1_to_S4_Tables_S1_to_S11.pdf]

# Supplementary Materials for

Natural Selection in a Bangladeshi Population from the Cholera-Endemic

Ganges River Delta

Elinor K. Karlsson, Jason B. Harris, Shervin Tabrizi, Atiqur Rahman, Ilya Shylakhter,  
Nick Patterson, Colm O'Dushlaine, Stephen F. Schaffner, Sameer Gupta, Fahima  
Chowdhury, Alaullah Sheikh, Ok Sarah Shin, Crystal Ellis, Christine Becker, Lynda M.  
Stuart, Stephen B. Calderwood, Edward T. Ryan, Firdausi Qadri, Pardis C. Sabeti,  
Regina C. LaRocque

correspondence to: [elinor@broadinstitute.org](mailto:elinor@broadinstitute.org)

**This PDF file includes:**

Methods

Figs. S1 to S4

Tables S1 to S11

## **Materials and Methods**

### Selection analysis

Phased SNP data from the 1000 Genomes Project was from March 2010 release ([ftp://ftp.1000genomes.ebi.ac.uk/vol1/ftp/pilot\\_data/release/2010\\_03/pilot1/](ftp://ftp.1000genomes.ebi.ac.uk/vol1/ftp/pilot_data/release/2010_03/pilot1/)). We tested for signals of natural selection in the BEB, Yoruba (YRI), North/West Europeans (CEU) and East Asians/Han Chinese (CHB+JPT) using  $CMS_{GW}$ , which combines posterior probabilities from 5 tests for selection into a composite likelihood score based on empirical distributions from simulations (24). To accommodate four populations, we modified the cross-population component tests to analyze three population pairs. We used likelihood tables developed for comparing highly differentiated populations (YRI, CEU, CHB+JPT), as CMS is robust to large variations in demography (23) and any skew from inaccurate demography will be conservative in BEB, minimizing false positives. Genes were mapped to selected regions using the RefSeqGene gene catalog (UCSC Genome Browser; hg18) and the LINC RNA catalog ([http://www.broadinstitute.org/genome\\_bio/human\\_lincrnas/](http://www.broadinstitute.org/genome_bio/human_lincrnas/)) (76-78).

### Gene set enrichment testing

We tested for enrichment in gene set catalogs from MSigDB v3.0 ([http://www.broadinstitute.org/gsea/msigdb/download\\_file.jsp?filePath=/resources/msigdb/3.0/c4.all.v3.0.orig.gmt](http://www.broadinstitute.org/gsea/msigdb/download_file.jsp?filePath=/resources/msigdb/3.0/c4.all.v3.0.orig.gmt)) and Gene Ontology (downloaded from <http://www.ensembl.org/biomart>). Blood group gene sets were made for all blood systems in NCBI's Blood Group Antigen Gene Mutation Database (<http://www.ncbi.nlm.nih.gov/projects/gv/mhc/xslcgi.cgi?cmd=bgmut/systems>). Potassium channel gene sets were generated from categories described in (38). For the IBD analysis, we tested four gene sets based on supplementary table in (60), two each for ulcerative colitis and Crohn's disease: one of all regions and one of regions with  $p_{GWAS} < 1 \times 10^{-10}$ .

**Fig. S1. Principle Component Analysis of Bangladesh, HapMap3 and Singapore populations.**

**A. Bangladeshi with HapMap3 and SGVP**

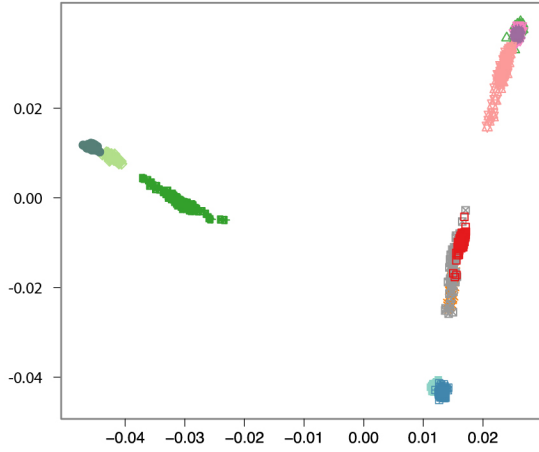

**Populations**

- Bangladeshi
- △ Chinese in Singapore (SGVP)
- × Gujarati Indian (HapMap3)
- ▽ Han Chinese (HapMap3)
- ⊠ Indians in Singapore (SGVP)
- \* Japanese (HapMap3)
- ◇ Luhya from Kenya (HapMap3)
- Maasai from Kenya (HapMap3)
- ⊠ Malay in Singapore (SGVP)
- ⊠ North/West European (HapMap3)
- Toscani from Italy (HapMap3)
- Yoruban from Nigeria (HapMap3)

**B. Bangladeshi with non-African HapMap3 and SGVP**

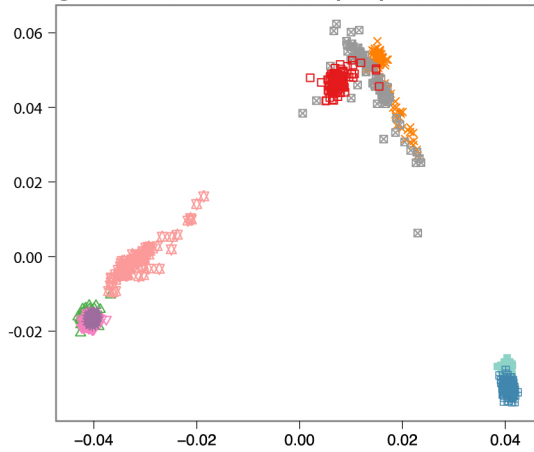

**C. Bangladeshi with Asian populations from Hapmap3 and SGVP**

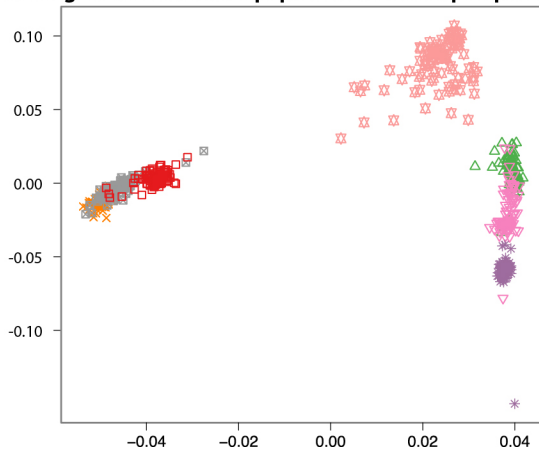

**Fig. S2. Comparing *ROLLOFF* fit of models with 1 or 2 admixture events.**

ROLLOFF analysis of decay in linkage disequilibrium in BEB, comparing 1 and 2 admixture event models (parental populations from India and East Asia). The fit of a two event admixture model (blue line) to our data (grey crosses) obtains events dated 250 and 43 generations ago, versus 52 generations for the single event model (red dashed line). There is little difference in fit between the two models and we find no statistical support for the more ancient flow.

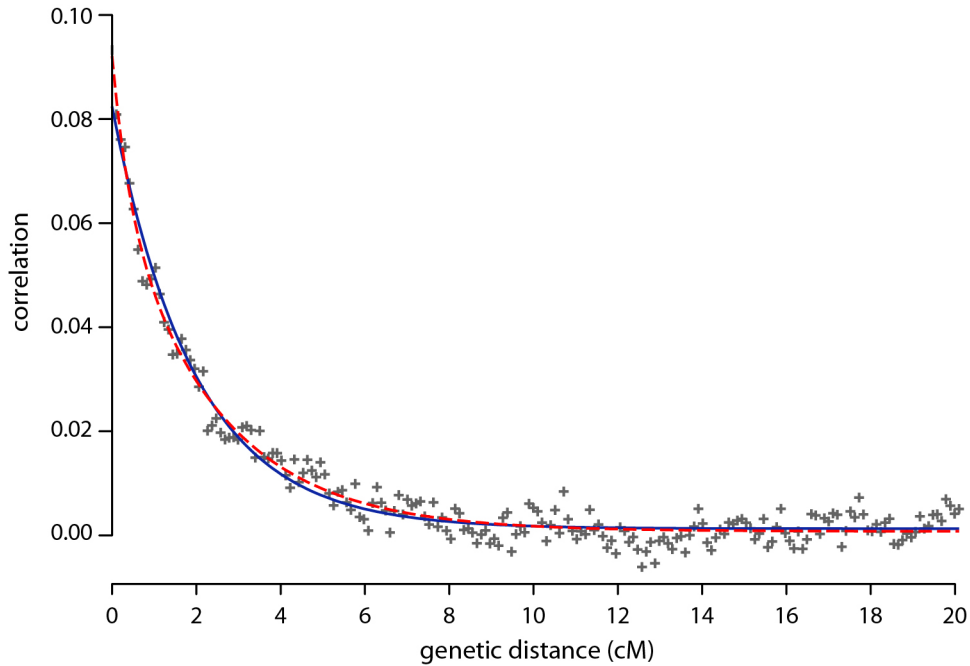

**Fig. S3. ADMIXTURE modeling with increasing numbers of ancestral populations**  
 ADMIXTURE maximum likelihood ancestry estimation at variable K (number of ancestral populations). (a) Individual ancestry sorted by population of origin (b) Cross validation error rate.

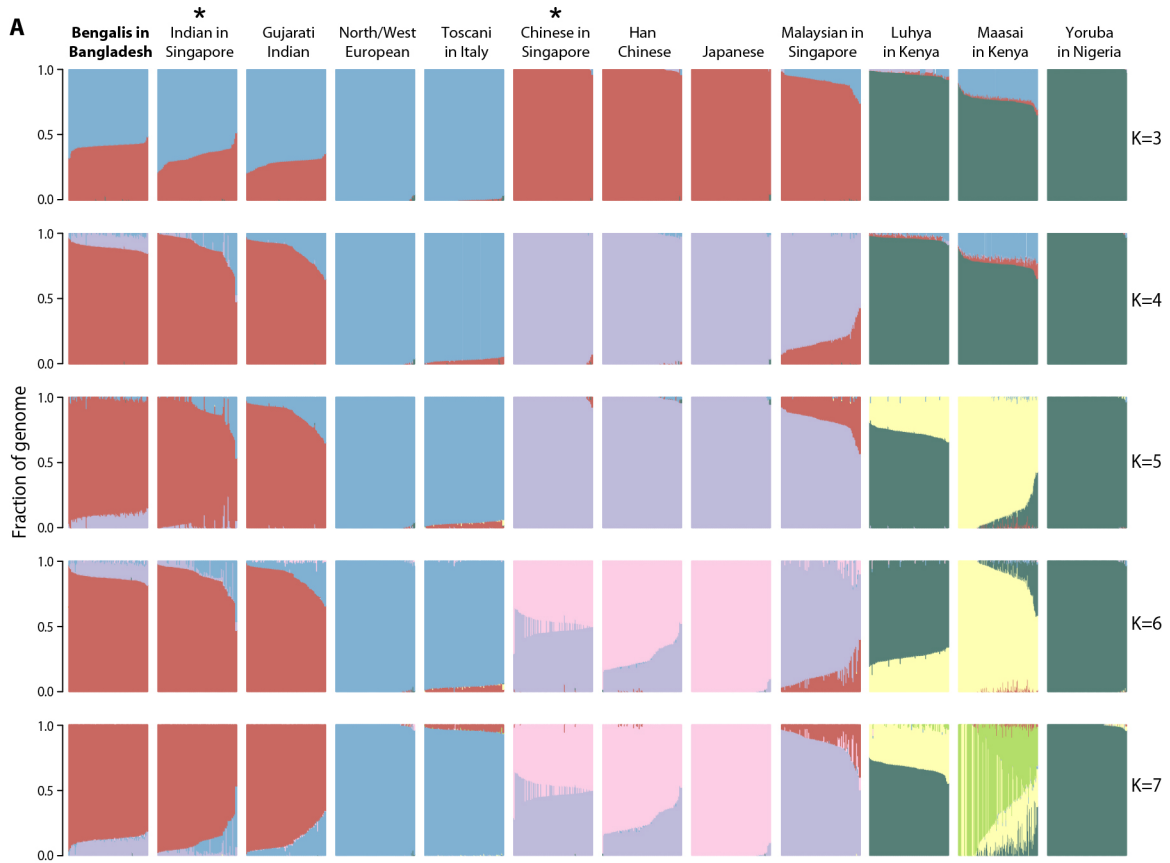

**Fig. S4. CMS<sub>GW</sub> found no selection at CFTR in the BEB.**

CMS<sub>GW</sub> detected no significant evidence for selection at CFTR in the BEB population. There is a strong signal approximately 2.5 Mb from CFTR, peaking at the 5' end of KCND2, a member of the voltage gated, calcium activated potassium channel gene set enriched for selection in the BEB (Table 1). Dashed line marks normalized CMS<sub>GW</sub> score of 3 (false positive rate < 0.01%).

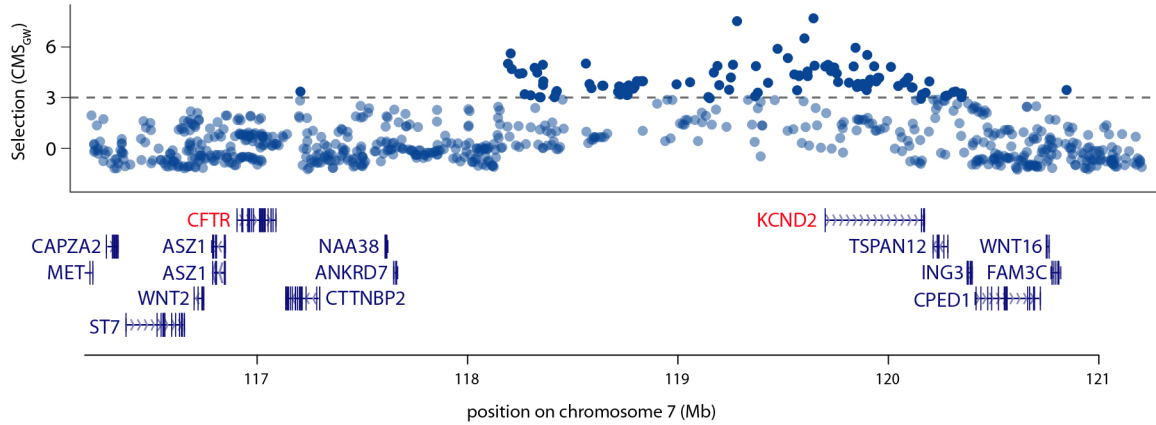

**Table S1. Whole Genome SNP Datasets**

Whole Genome SNP Datasets. To examine the history of the BEB, and their relationship to other populations, we combined the BEB genome-wide SNP dataset with data from two publically available datasets covering 16 populations: 8 populations from the International Haplotype Map Phase 3 dataset (HapMap3), 3 from the Singapore Genome Variation Project (SGVP) and 5 from the Human Genome Diversity Project (HGDP). To identify genomic regions with signals of selection using CMS, which includes cross-population tests of selection, we combined the BEB data with dense data for 3 populations from the 1000 Genomes Project (1KG).

| Population                                                                          | Name      | Source                       | #   | f3<br>statistic | Population Genetics                |                          | CMS<br>selection<br>scan |
|-------------------------------------------------------------------------------------|-----------|------------------------------|-----|-----------------|------------------------------------|--------------------------|--------------------------|
|                                                                                     |           |                              |     |                 | Principle<br>Component<br>Analysis | ADMIXTURE<br>(LD pruned) |                          |
| Bengalis from Dhaka, Bangladesh                                                     | BEB       | Illumina 1M Genotyping Array | 108 | X               | X                                  | X                        | X                        |
| Gujarati Indians in Houston, Texas                                                  | GIH       | HapMap3                      | 88  |                 | X                                  | X                        |                          |
| Utah residents with Northern and Western European ancestry from the CEPH collection | CEU       | HapMap3                      | 165 |                 | X                                  | X                        |                          |
| Japanese in Tokyo, Japan                                                            | JPT       | HapMap3                      | 86  |                 | X                                  | X                        |                          |
| Han Chinese in Beijing, China                                                       | CHB       | HapMap3                      | 84  |                 | X                                  | X                        |                          |
| Luhya in Webuye, Kenya                                                              | LWK       | HapMap3                      | 90  |                 | X                                  | X                        |                          |
| Maasai in Kinyawa, Kenya                                                            | MKK       | HapMap3                      | 171 |                 | X                                  | X                        |                          |
| Toscani in Italia                                                                   | TSI       | HapMap3                      | 88  |                 | X                                  | X                        |                          |
| Yoruba in Ibadan, Nigeria                                                           | YRI       | HapMap3                      | 167 |                 | X                                  | X                        |                          |
| Chinese in Singapore                                                                | CHS       | SGVP                         | 96  | X               | X                                  | X                        |                          |
| Indians in Singapore                                                                | INS       | SGVP                         | 83  | X               | X                                  | X                        |                          |
| Malay in Singapore                                                                  | MAS       | SGVP                         | 89  | X               | X                                  | X                        |                          |
| Chinese Dai in Yunnan Province, China                                               | Dai       | HGDP                         | 10  | X               |                                    |                          |                          |
| French Caucasians in Strasbourg, Grenoble, Marseille, Lille, Nantes, and Paris      | French    | HGDP                         | 28  | X               |                                    |                          |                          |
| Chinese Han in Shanghai, China                                                      | Han       | HGDP                         | 44  | X               |                                    |                          |                          |
| Pathan muslims in Hyderabad, Andhra Pradesh, India.                                 | Pathan    | HGDP                         | 22  | X               |                                    |                          |                          |
| Sindhi tribal group in Southern Pakistan                                            | Sindhi    | HGDP                         | 24  | X               |                                    |                          |                          |
| CEPH: Utah residents with Northern and Western European ancestry                    | CEU       | 1KG                          | 60  |                 |                                    |                          | X                        |
| Japanese in Tokyo, Japan and Han Chinese in Beijing, China                          | JPT + CHB | 1KG                          | 60  |                 |                                    |                          | X                        |
| Yoruba in Ibadan, Nigeria                                                           | YRI       | 1KG                          | 60  |                 |                                    |                          | X                        |

|                       |        |         |         |         |
|-----------------------|--------|---------|---------|---------|
| Number of populations | 9      | 12      | 12      | 4       |
| Number of SNPs        | 98,429 | 567,213 | 121,920 | 795,517 |

**Table S2.  $F_{ST}$  between Bangladesh and HapMap3 populations**

Population differentiation, measured as  $F_{ST}$ , between Bangladesh and 8 HapMap3 populations

|                      | Bangladesh | Gujarati Indian | Toscani from Italy | North/West European | Han Chinese | Japanese | Maasai from Kenya | Luhya from Kenya |
|----------------------|------------|-----------------|--------------------|---------------------|-------------|----------|-------------------|------------------|
| Gujarati Indian      | 0.0047     |                 |                    |                     |             |          |                   |                  |
| Toscani from Italy   | 0.0409     | 0.0345          |                    |                     |             |          |                   |                  |
| North/West European  | 0.0418     | 0.0351          | 0.0038             |                     |             |          |                   |                  |
| Han Chinese          | 0.0594     | 0.0763          | 0.1112             | 0.1105              |             |          |                   |                  |
| Japanese             | 0.0614     | 0.0777          | 0.1132             | 0.1119              | 0.0068      |          |                   |                  |
| Maasai from Kenya    | 0.0953     | 0.0958          | 0.0990             | 0.1045              | 0.1431      | 0.1444   |                   |                  |
| Luhya from Kenya     | 0.1329     | 0.1344          | 0.1435             | 0.1477              | 0.1780      | 0.1797   | 0.0170            |                  |
| Yoruban from Nigeria | 0.1441     | 0.1458          | 0.1555             | 0.1594              | 0.1872      | 0.1890   | 0.0271            | 0.0078           |



**Table S3. 3 Population Test**f<sub>3</sub> statistics

| Pop 1      | Pop 2      | Pop 3      | f3 score         | Std Error       | Z             |
|------------|------------|------------|------------------|-----------------|---------------|
| <b>CHS</b> | <b>INS</b> | <b>BEB</b> | <b>-0.005469</b> | <b>0.000113</b> | <b>-48.43</b> |
| Han        | INS        | BEB        | -0.005506        | 0.000114        | -48.28        |
| Dai        | INS        | BEB        | -0.005586        | 0.000122        | -45.76        |
| CHS        | Sindhi     | BEB        | -0.007959        | 0.000206        | -38.69        |
| Han        | Sindhi     | BEB        | -0.00803         | 0.000208        | -38.64        |
| Dai        | Sindhi     | BEB        | -0.008023        | 0.000216        | -37.09        |
| CHS        | Pathan     | BEB        | -0.007558        | 0.000214        | -35.36        |
| Han        | Pathan     | BEB        | -0.007595        | 0.000216        | -35.11        |
| Dai        | Pathan     | BEB        | -0.007951        | 0.000231        | -34.46        |
| Dai        | French     | BEB        | -0.00945         | 0.000347        | -27.22        |
| CHS        | French     | BEB        | -0.008851        | 0.000332        | -26.69        |
| French     | Han        | BEB        | -0.008816        | 0.000338        | -26.07        |
| French     | INS        | BEB        | 0.003412         | 0.000116        | 29.33         |
| INS        | Pathan     | BEB        | 0.002677         | 0.000077        | 34.59         |
| INS        | Sindhi     | BEB        | 0.002716         | 0.000076        | 35.93         |
| Pathan     | Sindhi     | BEB        | 0.008658         | 0.000149        | 58.00         |
| French     | Sindhi     | BEB        | 0.01372          | 0.000227        | 60.32         |
| French     | Pathan     | BEB        | 0.016954         | 0.000262        | 64.74         |
| Dai        | Han        | BEB        | 0.056847         | 0.000553        | 102.77        |
| CHS        | Dai        | BEB        | 0.05719          | 0.000543        | 105.40        |
| CHS        | Han        | BEB        | 0.059387         | 0.000541        | 109.76        |

**Table S4. Ancestry analysis with ADMIXTURE.**

| <b>Population</b>    | <b>Cluster 1</b> |                 | <b>Cluster 2</b> |                 | <b>Cluster 3</b> |                 | <b>Cluster 4</b> |                 | <b>Cluster 5</b> |                 |
|----------------------|------------------|-----------------|------------------|-----------------|------------------|-----------------|------------------|-----------------|------------------|-----------------|
|                      | <i>avg</i>       | <i>std. dev</i> |
| Bangladesh           | 0.897            | 0.024           | 0.093            | 0.026           | 0.009            | 0.013           | 0.000            | 0.002           | 0.000            | 0.000           |
| North/West European  | 0.001            | 0.002           | 0.000            | 0.002           | 0.998            | 0.006           | 0.001            | 0.004           | 0.000            | 0.000           |
| Han Chinese          | 0.001            | 0.004           | 0.995            | 0.010           | 0.004            | 0.008           | 0.000            | 0.003           | 0.000            | 0.000           |
| Chinese in Singapore | 0.002            | 0.009           | 0.998            | 0.010           | 0.000            | 0.001           | 0.000            | 0.002           | 0.000            | 0.000           |
| Gujarati Indian      | 0.876            | 0.084           | 0.001            | 0.004           | 0.123            | 0.084           | 0.000            | 0.001           | 0.000            | 0.000           |
| Indians in Singapore | 0.906            | 0.095           | 0.017            | 0.036           | 0.077            | 0.094           | 0.000            | 0.000           | 0.000            | 0.001           |
| Japanese             | 0.000            | 0.000           | 0.999            | 0.007           | 0.001            | 0.003           | 0.000            | 0.004           | 0.000            | 0.000           |
| Luhya from Kenya     | 0.000            | 0.000           | 0.001            | 0.003           | 0.002            | 0.008           | 0.734            | 0.033           | 0.263            | 0.036           |
| Malay in Singapore   | 0.176            | 0.070           | 0.822            | 0.072           | 0.001            | 0.005           | 0.000            | 0.001           | 0.000            | 0.002           |
| Maasai from Kenya    | 0.008            | 0.017           | 0.000            | 0.001           | 0.003            | 0.008           | 0.078            | 0.094           | 0.911            | 0.097           |
| Toscani from Italy   | 0.035            | 0.012           | 0.000            | 0.002           | 0.963            | 0.012           | 0.000            | 0.001           | 0.002            | 0.006           |
| Yoruban from Nigeria | 0.000            | 0.001           | 0.000            | 0.001           | 0.000            | 0.003           | 0.999            | 0.004           | 0.000            | 0.002           |

**Table S5. Candidate selected regions in BEB population**

| #  | Location (hg18)           | Size (kb) | Max CMS score | # Genes | Genes                                                                                                                                                                                                                                                                                                     |
|----|---------------------------|-----------|---------------|---------|-----------------------------------------------------------------------------------------------------------------------------------------------------------------------------------------------------------------------------------------------------------------------------------------------------------|
| 1  | chr2:96204472-96450166    | 246       | 12.66         | 7       | STARD7, LOC285033, TMEM127, CIAO1, ASCC3L1, KIAA1754L, NCAPH                                                                                                                                                                                                                                              |
| 2  | chr1:246860501-247003688  | 143       | 9.38          | 4       | OR2T35, OR2T27, OR14I1, LOC646627                                                                                                                                                                                                                                                                         |
| 3  | chr20:47858175-48083964   | 226       | 9.30          | 4       | SLC9A8, SPATA2, RNF114, SNAI1                                                                                                                                                                                                                                                                             |
| 4  | chr10:45284677-45384677   | 100       | 9.02          | 1       | MARCH8                                                                                                                                                                                                                                                                                                    |
| 5  | chr16:30312959-31301270   | 988       | 8.97          | 40      | ZNF553, ZNF771, XTP3TPA, SEPHS2, ITGAL, ZNF768, ZNF747, ZNF764, ZNF688, ZNF785, ZNF689, PRR14, FBRS, SRCAP, PHKG2, LOC90835, RNF40, ZNF629, BCL7C, CTF1, FBXL19, ORAI3, SETD1A, HSD3B7, STX1B, STX4, ZNF668, ZNF646, POL3S, VKORC1, BCKDK, MYST1, PRSS8, PRSS36, FUS, PYCARD, TRIM72, PYDC1, ITGAM, ITGAX |
| 6  | chr8:8110844-8211017      | 100       | 8.77          | 0       | <i>FLJ10661</i>                                                                                                                                                                                                                                                                                           |
| 7  | chr2:72556447-72934657    | 378       | 8.30          | 1       | EXOC6B                                                                                                                                                                                                                                                                                                    |
| 8  | chr2:163254213-163942575  | 688       | 7.74          | 1       | KCNH7                                                                                                                                                                                                                                                                                                     |
| 9  | chr7:119120356-120210059  | 1090      | 7.70          | 1       | KCND2                                                                                                                                                                                                                                                                                                     |
| 10 | chr14:62443764-63110864   | 667       | 7.57          | 4       | KCNH5, RHOJ, GPHB5, PPP2R5E                                                                                                                                                                                                                                                                               |
| 11 | chr7:65591573-65901445    | 310       | 7.52          | 2       | KCTD7, RABGEF1                                                                                                                                                                                                                                                                                            |
| 12 | chr11:129367548-129564791 | 197       | 7.37          | 3       | PRDM10, APLP2, ST14                                                                                                                                                                                                                                                                                       |
| 13 | chr17:56212699-56662837   | 450       | 7.32          | 2       | BCAS3, LOC729617                                                                                                                                                                                                                                                                                          |
| 14 | chr2:97581923-97702667    | 121       | 7.20          | 3       | COX5B, ACTR1B, ZAP70                                                                                                                                                                                                                                                                                      |
| 15 | chr1:35196775-36378774    | 1182      | 7.16          | 17      | ZMYM6, ZMYM1, SFPQ, ZMYM4, KIAA0319L, NCDN, TFAP2E, PSMB2, C1orf216, CLSPN, EIF2C4, EIF2C1, EIF2C3, TEKT2, ADPRHL2, COL8A2, TRAPPC3                                                                                                                                                                       |
| 16 | chr22:45116361-45222092   | 106       | 7.02          | 2       | TRMU, CELSR1                                                                                                                                                                                                                                                                                              |
| 17 | chr5:117332265-117961872  | 630       | 6.98          | 0       |                                                                                                                                                                                                                                                                                                           |
| 18 | chr13:56776369-56906916   | 131       | 6.96          | 0       |                                                                                                                                                                                                                                                                                                           |
| 19 | chr13:56441720-56653368   | 212       | 6.88          | 1       | FLJ40296                                                                                                                                                                                                                                                                                                  |
| 20 | chr2:96476699-96981116    | 504       | 6.80          | 11      | LINCR, ARID5A, KIAA1310, FER1L5, LMAN2L, CNNM4, CNNM3, ANKRD23, ANKRD39, SEMA4C, LOC51252                                                                                                                                                                                                                 |
| 21 | chr2:60957829-61241691    | 284       | 6.75          | 4       | REL, PUS10, PEX13, KIAA1841                                                                                                                                                                                                                                                                               |
| 22 | chr7:65192057-65327158    | 135       | 6.74          | 3       | ASL, RCP9, TPST1                                                                                                                                                                                                                                                                                          |
| 23 | chr4:41500330-41897307    | 397       | 6.73          | 4       | TMEM33, WDR21B, SLC30A9, CCDC4                                                                                                                                                                                                                                                                            |
| 24 | chr2:97787810-98033835    | 246       | 6.72          | 1       | TMEM131                                                                                                                                                                                                                                                                                                   |
| 25 | chr3:48649603-49077789    | 428       | 6.46          | 13      | CELSR3, NCKIPSD, IHPK2, PRKAR2A, SLC25A20, C3orf71, ARIH2, PH-4, WDR6, DALRD3, C3orf60, IMPDH2, QRICH1                                                                                                                                                                                                    |
| 26 | chr1:205127559-205227559  | 100       | 6.45          | 4       | IL24, FAIM3, PIGR, FCAMR                                                                                                                                                                                                                                                                                  |
| 27 | chr10:22313652-22450452   | 137       | 6.45          | 1       | DNAJC1                                                                                                                                                                                                                                                                                                    |
| 28 | chr15:81373168-81591756   | 219       | 6.43          | 5       | HOMER2, FAM103A1, C15orf40, BTBD1, TM6SF1                                                                                                                                                                                                                                                                 |

|    |                           |      |      |    |                                                                                                                                                                       |
|----|---------------------------|------|------|----|-----------------------------------------------------------------------------------------------------------------------------------------------------------------------|
| 29 | chr11:87911055-88223280   | 312  | 6.43 | 1  | GRM5                                                                                                                                                                  |
| 30 | chr3:87812428-88370387    | 558  | 6.42 | 4  | HTR1F, CGGBP1, ZNF654, C3orf38                                                                                                                                        |
| 31 | chr11:66560041-67041927   | 482  | 6.41 | 21 | SYT12, RHOD, FBXL11, ADRBK1, ANKRD13D, SSH3, POLD4, CLCF1, RAD9A, PPP1CA, TBC1D10C, KIAA1394, RPS6KB2, PTPRCAP, CORO1B, GPR152, CABP4, TMEM134, AIP, PITPNM1, CDK2AP2 |
| 32 | chr12:55794772-56187449   | 393  | 6.41 | 11 | LRP1, NXPH4, SHMT2, NDUFA4L2, STAC3, R3HDM2, INHBC, INHBE, GLI1, ARHGAP9, MARS                                                                                        |
| 33 | chr2:205884483-206042496  | 158  | 6.35 | 1  | PARD3B                                                                                                                                                                |
| 34 | chr6:105237478-105587627  | 350  | 6.21 | 2  | HACE1, LIN28B                                                                                                                                                         |
| 35 | chr16:31622282-31775062   | 153  | 6.17 | 0  |                                                                                                                                                                       |
| 36 | chr2:72171698-72390351    | 219  | 6.16 | 2  | CYP26B1, EXOC6B                                                                                                                                                       |
| 37 | chr8:99560993-100619301   | 1058 | 6.14 | 3  | STK3, OSR2, VPS13B                                                                                                                                                    |
| 38 | chr17:59873629-60064061   | 190  | 6.06 | 5  | C17orf60, POLG2, DDX5, CCDC45, SMURF2                                                                                                                                 |
| 39 | chr2:74441365-74643702    | 202  | 6.05 | 18 | DCTN1, WDR54, RTKN, ZNHIT4, WBP1, GCS1, MRPL53, CCDC142, TTC31, LBX2, PCGF1, TLX2, DQX1, AUP1, HTRA2, LOXL3, DOK1, C2orf65                                            |
| 40 | chr17:60723634-60909402   | 186  | 6.04 | 0  |                                                                                                                                                                       |
| 41 | chr15:46163776-46282679   | 119  | 6.01 | 2  | SLC24A5, MYEF2                                                                                                                                                        |
| 42 | chr3:142211453-142490751  | 279  | 5.83 | 2  | SPSB4, ACPL2                                                                                                                                                          |
| 43 | chr1:165476379-165658590  | 182  | 5.79 | 1  | POU2F1                                                                                                                                                                |
| 44 | chr4:106703606-107031286  | 328  | 5.74 | 3  | FLJ20184, INTS12, GSTCD                                                                                                                                               |
| 45 | chr8:66849249-67123775    | 275  | 5.70 | 2  | PDE7A, DNAJC5B                                                                                                                                                        |
| 46 | chr6:131753370-131901651  | 148  | 5.69 | 0  |                                                                                                                                                                       |
| 47 | chr4:29727693-29948439    | 221  | 5.68 | 0  |                                                                                                                                                                       |
| 48 | chr6:73745382-74032917    | 288  | 5.67 | 3  | KCNQ5, LOC100129128, KHDC1                                                                                                                                            |
| 49 | chr2:82761461-82987356    | 226  | 5.66 | 0  |                                                                                                                                                                       |
| 50 | chr4:29336821-29558398    | 222  | 5.65 | 0  |                                                                                                                                                                       |
| 51 | chr10:118088143-118261246 | 173  | 5.65 | 2  | C10orf96, PNLIPRP3                                                                                                                                                    |
| 52 | chr11:122671246-122799152 | 128  | 5.63 | 0  |                                                                                                                                                                       |
| 53 | chr10:130932072-131087143 | 155  | 5.62 | 0  |                                                                                                                                                                       |
| 54 | chr7:73664429-73827987    | 164  | 5.62 | 2  | GTF2I, NCF1                                                                                                                                                           |
| 55 | chr13:105802626-105906075 | 103  | 5.61 | 0  |                                                                                                                                                                       |
| 56 | chr7:118155039-118409989  | 255  | 5.61 | 0  |                                                                                                                                                                       |
| 57 | chr6:105618813-105799829  | 181  | 5.60 | 3  | LIN28B, BVES, POPDC3                                                                                                                                                  |
| 58 | chr7:111175434-111355649  | 180  | 5.60 | 1  | DOCK4                                                                                                                                                                 |
| 59 | chr11:66031159-66257760   | 227  | 5.54 | 11 | DPP3, BBS1, ZDHHC24, ACTN3, CTSF, CCDC87, CCS, RBM14, RBM4, RBM4B, SPTBN2                                                                                             |
| 60 | chr19:11395725-11567995   | 172  | 5.53 | 8  | CCDC151, PRKCSH, ELAVL3, ZNF653, ECSIT, CNN1, ELOF1, ACP5                                                                                                             |
| 61 | chr17:55510921-55769951   | 259  | 5.53 | 3  | HEATR6, CA4, USP32                                                                                                                                                    |
| 62 | chr7:148319871-148502995  | 183  | 5.51 | 4  | PDIA4, ZNF786, ZNF425, ZNF398                                                                                                                                         |
| 63 | chr1:191292717-191514030  | 221  | 5.49 | 5  | UCHL5, TROVE2, GLRX2, CDC73, B3GALT2                                                                                                                                  |
| 64 | chr12:87733005-87835702   | 103  | 5.48 | 0  |                                                                                                                                                                       |

|     |                           |     |      |    |                                                                                                                    |
|-----|---------------------------|-----|------|----|--------------------------------------------------------------------------------------------------------------------|
| 65  | chr17:50954728-51293371   | 339 | 5.45 | 2  | TMEM100, PCTP                                                                                                      |
| 66  | chr15:81648149-81778085   | 130 | 5.42 | 2  | HGDFRP3, BNC1                                                                                                      |
| 67  | chr1:831808-958247        | 126 | 5.41 | 7  | SAMD11, NOC2L, KLHL17, PLEKHN1, HES4, ISG15, AGRN                                                                  |
| 68  | chr15:28888490-29104439   | 216 | 5.40 | 3  | MTMR15, MTMR10, TRPM1                                                                                              |
| 69  | chr12:48010827-48407359   | 397 | 5.32 | 9  | TROAP, C1QL4, DNAJC22, SPATS2, KCNH3, MCRS1, C12orf25, PRPF40B, FMNL3                                              |
| 70  | chr9:95381811-95552915    | 171 | 5.28 | 1  | PHF2                                                                                                               |
| 71  | chr15:70521862-70672069   | 150 | 5.24 | 1  | ARIH1                                                                                                              |
| 72  | chr2:9290239-9689347      | 399 | 5.23 | 6  | DDEF2, ITGB1BP1, CPSF3, IAH1, ADAM17, YWHAQ                                                                        |
| 73  | chr13:31010903-31110903   | 100 | 5.22 | 0  |                                                                                                                    |
| 74  | chr12:20927650-21027650   | 100 | 5.19 | 1  | SLCO1B3                                                                                                            |
| 75  | chr3:168770464-169143547  | 373 | 5.19 | 3  | WDR49, PDCD10, SERPINI1                                                                                            |
| 76  | chr2:237651106-237828782  | 178 | 5.19 | 1  | COPS8                                                                                                              |
| 77  | chr15:69912174-70024573   | 112 | 5.18 | 1  | MYO9A                                                                                                              |
| 78  | chr1:6234024-6410129      | 176 | 5.17 | 4  | GPR153, ACOT7, HES2, ESPN                                                                                          |
| 79  | chr8:106772233-106956416  | 184 | 5.17 | 1  | ZFPM2                                                                                                              |
| 80  | chr10:134957945-135142863 | 185 | 5.17 | 9  | TUBGCP2, ZNF511, CALY, PRAP1, C10orf125, ECHS1, PAOX, MTG1, SPRN                                                   |
| 81  | chr1:26030965-26172646    | 142 | 5.14 | 5  | FAM54B, C1orf135, PAQR7, STMN1, PAFAH2                                                                             |
| 82  | chr11:66268824-66415567   | 147 | 5.14 | 4  | C11orf80, RCE1, PC, LRFN4                                                                                          |
| 83  | chr2:197503694-197779960  | 276 | 5.14 | 1  | ANKRD44                                                                                                            |
| 84  | chr18:22014765-22160306   | 146 | 5.13 | 2  | PSMA8, TAF4B                                                                                                       |
| 85  | chr17:17478246-17960954   | 483 | 5.13 | 8  | RAI1, SREBF1, TOM1L2, LRRC48, ATPAF2, C17orf39, DRG2, MYO15A                                                       |
| 86  | chr2:190352420-190730503  | 378 | 5.08 | 4  | ORMDL1, PMS1, MSTN, MGC13057                                                                                       |
| 87  | chr19:62920241-63020241   | 100 | 5.07 | 4  | ZNF671, ZNF776, ZNF586, ZNF552                                                                                     |
| 88  | chr21:16749665-16967157   | 217 | 5.07 | 1  | C21orf34                                                                                                           |
| 89  | chr14:61795612-61955845   | 160 | 5.07 | 0  |                                                                                                                    |
| 90  | chr20:9441622-9574643     | 133 | 5.06 | 2  | C20orf103, PAK7                                                                                                    |
| 91  | chr20:53080729-53221407   | 141 | 5.03 | 0  |                                                                                                                    |
| 92  | chr7:142353741-142588076  | 234 | 4.98 | 4  | KEL, OR9A2, OR6V1, PIP                                                                                             |
| 93  | chr2:205419045-205599057  | 180 | 4.96 | 1  | PARD3B                                                                                                             |
| 94  | chr9:95125501-95354732    | 229 | 4.95 | 3  | C9orf129, FAM120AOS, FAM120A                                                                                       |
| 95  | chr10:96367941-96620192   | 252 | 4.95 | 2  | CYP2C18, CYP2C19                                                                                                   |
| 96  | chr3:112262597-112423795  | 161 | 4.95 | 1  | PVRL3                                                                                                              |
| 97  | chr2:125891457-126138821  | 247 | 4.94 | 0  |                                                                                                                    |
| 98  | chr13:40891670-40991670   | 100 | 4.92 | 1  | C13orf15                                                                                                           |
| 99  | chr6:31703901-31815903    | 112 | 4.92 | 16 | BAT2, BAT3, APOM, C6orf47, BAT4, CSNK2B, LY6G5B, LY6G5C, BAT5, LY6G6F, LY6G6D, LY6G6C, C6orf25, DDAH2, CLIC1, MSH5 |
| 100 | chr18:38146306-38256332   | 110 | 4.91 | 0  |                                                                                                                    |
| 101 | chr3:50822404-50946281    | 124 | 4.90 | 1  | DOCK3                                                                                                              |
| 102 | chr3:198725887-198830355  | 104 | 4.90 | 1  | BDH1                                                                                                               |
| 103 | chr10:22469942-22628180   | 158 | 4.89 | 0  |                                                                                                                    |
| 104 | chr8:134987966-135274918  | 287 | 4.88 | 0  |                                                                                                                    |
| 105 | chr16:34094548-34194548   | 100 | 4.87 | 0  |                                                                                                                    |
| 106 | chr13:91173009-91438176   | 265 | 4.86 | 1  | GPC5                                                                                                               |

|     |                           |     |      |   |                                                |
|-----|---------------------------|-----|------|---|------------------------------------------------|
| 107 | chr10:23143356-23337383   | 194 | 4.85 | 1 | ARMC3                                          |
| 108 | chr1:103167085-103320617  | 154 | 4.85 | 1 | COL11A1                                        |
| 109 | chr2:190839830-190988591  | 149 | 4.84 | 3 | HIBCH, INPP1, FLJ20160                         |
| 110 | chr16:85999328-86099328   | 100 | 4.84 | 1 | ZCCHC14                                        |
| 111 | chr12:125532855-125747401 | 215 | 4.81 | 0 |                                                |
| 112 | chr3:199159015-199278595  | 120 | 4.80 | 3 | IQCG, RPL35A, LMLN                             |
| 113 | chr2:158925179-159108381  | 183 | 4.80 | 2 | CCDC148, PKP4                                  |
| 114 | chr12:81799661-81996865   | 197 | 4.78 | 1 | TMTC2                                          |
| 115 | chr6:101036227-101352801  | 317 | 4.76 | 1 | ASCC3                                          |
| 116 | chr21:30003605-30103605   | 100 | 4.75 | 1 | GRIK1                                          |
| 117 | chr16:27471237-27690930   | 220 | 4.74 | 1 | KIAA0556                                       |
| 118 | chr1:232733129-232854961  | 122 | 4.74 | 1 | IRF2BP2                                        |
| 119 | chr12:87335813-87636557   | 301 | 4.71 | 1 | KITLG                                          |
| 120 | chr2:219185249-219313817  | 129 | 4.71 | 6 | PLCD4, ZNF142, BCS1L, RNF25, STK36, TTLL4      |
| 121 | chr16:46883278-46983278   | 100 | 4.70 | 2 | LONP2, SIAH1                                   |
| 122 | chr11:121017926-121238991 | 221 | 4.69 | 0 |                                                |
| 123 | chr17:36911424-37068570   | 157 | 4.69 | 7 | KRT13, KRT15, KRT19, KRT9, KRT14, KRT16, KRT17 |
| 124 | chr17:46560973-46712763   | 152 | 4.69 | 5 | NME1, NME1-NME2, NME2, MBTD1, UTP18            |
| 125 | chr8:107183154-107368735  | 186 | 4.68 | 1 | OXR1                                           |
| 126 | chr3:88405026-88505026    | 100 | 4.67 | 0 |                                                |
| 127 | chr15:58458349-58632099   | 174 | 4.64 | 3 | ANXA2, NARG2, RORA                             |
| 128 | chr2:213045634-213249128  | 203 | 4.64 | 1 | ERBB4                                          |
| 129 | chr16:45091599-45191599   | 100 | 4.63 | 1 | SHCBP1                                         |
| 130 | chr4:171685791-172094831  | 409 | 4.63 | 0 |                                                |
| 131 | chr16:46765699-46865699   | 100 | 4.62 | 2 | ABCC11, LONP2                                  |
| 132 | chr17:55779097-55996815   | 218 | 4.61 | 3 | USP32, C17orf64, APPBP2                        |
| 133 | chr16:49929755-50081366   | 152 | 4.60 | 0 |                                                |
| 134 | chr16:34895632-34995632   | 100 | 4.59 | 0 |                                                |
| 135 | chr2:88026347-88175133    | 149 | 4.58 | 2 | KRCC1, SMYD1                                   |
| 136 | chr9:122799711-123110846  | 311 | 4.58 | 4 | C5, CEP110, RAB14, GSN                         |
| 137 | chr3:106206655-106339543  | 133 | 4.58 | 0 |                                                |
| 138 | chr15:27077239-27177239   | 100 | 4.57 | 1 | APBA2                                          |
| 139 | chr2:125708515-125837346  | 129 | 4.56 | 0 |                                                |
| 140 | chr1:67139020-67309707    | 171 | 4.56 | 3 | WDR78, MIER1, SLC35D1                          |
| 141 | chr12:86937582-87147672   | 210 | 4.56 | 4 | C12orf50, C12orf29, CEP290, TMTC3              |
| 142 | chr4:80136407-80445408    | 309 | 4.54 | 0 |                                                |
| 143 | chr8:71606476-71773595    | 167 | 4.54 | 3 | TRAM1, LACTB2, XKR9                            |
| 144 | chr9:10954145-11061845    | 108 | 4.53 | 0 |                                                |
| 145 | chr1:55296952-55452792    | 156 | 4.52 | 2 | PCSK9, USP24                                   |
| 146 | chr11:88240385-88359000   | 119 | 4.52 | 1 | GRM5                                           |
| 147 | chr20:38422242-38536905   | 115 | 4.51 | 0 |                                                |
| 148 | chr1:64098164-64256265    | 158 | 4.51 | 1 | ROR1                                           |
| 149 | chr2:73489360-73803227    | 314 | 4.50 | 3 | ALMS1, NAT8, NAT8B                             |
| 150 | chr16:79497360-79687142   | 190 | 4.50 | 5 | C16orf61, CENPN, ATMIN, C16orf46, GCSH         |
| 151 | chr3:166926418-167239549  | 313 | 4.47 | 1 | BCHE                                           |
| 152 | chr20:29940726-30118633   | 178 | 4.47 | 5 | TTLL9, PDRG1, XKR7, C20orf160, HCK             |

|     |                           |     |      |   |                                                                      |
|-----|---------------------------|-----|------|---|----------------------------------------------------------------------|
| 153 | chr14:68552144-68697749   | 146 | 4.47 | 1 | WDR22                                                                |
| 154 | chr13:44533690-44732263   | 199 | 4.46 | 2 | GTF2F2, KCTD4                                                        |
| 155 | chr4:33318325-33492559    | 174 | 4.45 | 0 |                                                                      |
| 156 | chr2:229052479-229239730  | 187 | 4.45 | 0 |                                                                      |
| 157 | chr9:125381089-125552528  | 171 | 4.45 | 1 | DENND1A                                                              |
| 158 | chr6:136668671-137001357  | 333 | 4.44 | 2 | MAP7, MAP3K5                                                         |
| 159 | chr2:158207988-158364390  | 156 | 4.43 | 1 | ACVR1                                                                |
| 160 | chr6:118228907-118339350  | 110 | 4.39 | 1 | SLC35F1                                                              |
| 161 | chr5:170280848-170623067  | 342 | 4.39 | 1 | RANBP17                                                              |
| 162 | chr3:176856725-176995567  | 139 | 4.38 | 1 | NAALADL2                                                             |
| 163 | chr6:79579015-79892326    | 313 | 4.38 | 2 | IRAK1BP1, PHIP                                                       |
| 164 | chr3:44202343-44493069    | 291 | 4.37 | 2 | C3orf23, ZNF445                                                      |
| 165 | chr4:170027542-170127542  | 100 | 4.37 | 1 | PALLD                                                                |
| 166 | chr15:70290476-70415126   | 125 | 4.37 | 3 | PKM2, PARP6, BRUNOL6                                                 |
| 167 | chr15:33567373-33667373   | 100 | 4.34 | 1 | ATPBD4                                                               |
| 168 | chr7:36976683-37080082    | 103 | 4.34 | 1 | ELMO1                                                                |
| 169 | chr10:83991355-84355739   | 364 | 4.34 | 1 | NRG3                                                                 |
| 170 | chr6:129261105-129446944  | 186 | 4.33 | 1 | LAMA2                                                                |
| 171 | chr15:89552911-89652911   | 100 | 4.33 | 1 | SV2B                                                                 |
| 172 | chr15:41438222-41666300   | 228 | 4.32 | 5 | ZSCAN29, TUBGCP4, TP53BP1, MAP1A, HISPPD2A                           |
| 173 | chr17:71298737-71503745   | 205 | 4.32 | 9 | UNK, UNC13D, WBP2, TRIM47, TRIM65, MRPL38, FBF1, ACOX1, LOC100134934 |
| 174 | chr2:157816760-157920279  | 104 | 4.32 | 2 | GALNT5, ERMN                                                         |
| 175 | chr14:56687476-57040198   | 353 | 4.30 | 4 | EXOC5, C14orf108, NAT12, C14orf105                                   |
| 176 | chr1:93778867-94154851    | 376 | 4.29 | 4 | FNBP1L, BCAR3, DNTTIP2, GCLM                                         |
| 177 | chr2:121119134-121239271  | 120 | 4.28 | 0 |                                                                      |
| 178 | chr15:73448936-73689839   | 241 | 4.28 | 3 | SIN3A, PTPN9, SNUPN                                                  |
| 179 | chr17:59007879-59138788   | 131 | 4.27 | 5 | WDR68, CCDC44, MAP3K3, LIMD2, LYK5                                   |
| 180 | chr4:33499980-33684195    | 184 | 4.26 | 0 |                                                                      |
| 181 | chr2:192920099-193020099  | 100 | 4.25 | 0 |                                                                      |
| 182 | chr1:233362909-233555310  | 192 | 4.24 | 2 | RBM34, ARID4B                                                        |
| 183 | chr11:60470408-60570408   | 100 | 4.22 | 2 | SLC15A3, CD6                                                         |
| 184 | chr6:34252844-34383909    | 131 | 4.22 | 3 | HMGA1, C6orf1, NUDT3                                                 |
| 185 | chr2:82565084-82721859    | 157 | 4.21 | 0 |                                                                      |
| 186 | chr2:22259026-22403595    | 145 | 4.20 | 0 |                                                                      |
| 187 | chr4:12010385-12121961    | 112 | 4.17 | 0 |                                                                      |
| 188 | chr7:106753657-106867115  | 113 | 4.17 | 1 | COG5                                                                 |
| 189 | chr1:54274463-54374463    | 100 | 4.16 | 2 | TMEM59, C1orf83                                                      |
| 190 | chr1:233866562-234087074  | 221 | 4.14 | 2 | GNG4, LYST                                                           |
| 191 | chr11:133528364-133677671 | 149 | 4.14 | 5 | NCAPD3, VPS26B, THYN1, ACAD8, GLB1L3                                 |
| 192 | chr18:64760381-64945268   | 185 | 4.11 | 1 | CCDC102B                                                             |
| 193 | chr4:114419346-114570349  | 151 | 4.10 | 1 | ANK2                                                                 |
| 194 | chr2:183438653-183571657  | 133 | 4.07 | 2 | FRZB, NCKAP1                                                         |
| 195 | chr5:109940006-110089526  | 150 | 4.07 | 1 | FLJ43080                                                             |
| 196 | chr17:56091407-56191407   | 100 | 4.06 | 2 | PPM1D, BCAS3                                                         |
| 197 | chr1:64965446-65065446    | 100 | 4.06 | 1 | RAVER2                                                               |
| 198 | chr6:34675122-34880880    | 206 | 4.04 | 3 | C6orf106, SNRPC, UHRF1BP1                                            |
| 199 | chr2:98152695-98345361    | 193 | 4.04 | 2 | VWA3B, CNGA3                                                         |

|     |                           |     |      |    |                                                                                         |
|-----|---------------------------|-----|------|----|-----------------------------------------------------------------------------------------|
| 200 | chr1:93075257-93175257    | 100 | 4.04 | 2  | RPL5, FAM69A                                                                            |
| 201 | chr8:71788747-71929582    | 141 | 4.03 | 1  | XKR9                                                                                    |
| 202 | chr16:46236842-46424754   | 188 | 4.03 | 1  | PHKB                                                                                    |
| 203 | chr12:65737418-65892386   | 155 | 4.03 | 0  |                                                                                         |
| 204 | chr4:123581338-123726077  | 145 | 4.02 | 1  | IL2                                                                                     |
| 205 | chr2:94888725-94988725    | 100 | 4.02 | 1  | TEKT4                                                                                   |
| 206 | chr9:90820420-90933940    | 114 | 4.02 | 1  | SHC3                                                                                    |
| 207 | chr1:246296107-246396107  | 100 | 4.02 | 2  | OR2L13, OR2M5                                                                           |
| 208 | chr18:65894434-66044084   | 150 | 4.01 | 1  | RTTN                                                                                    |
| 209 | chr12:107674927-107779318 | 104 | 4.01 | 1  | SSH1                                                                                    |
| 210 | chr7:86141717-86262469    | 121 | 4.01 | 1  | GRM3                                                                                    |
| 211 | chr4:12139855-12245691    | 106 | 4.01 | 0  |                                                                                         |
| 212 | chr3:31257160-31357160    | 100 | 4.00 | 0  |                                                                                         |
| 213 | chr3:50628862-50797668    | 169 | 4.00 | 2  | MAPKAPK3, DOCK3                                                                         |
| 214 | chr10:21974224-22074224   | 100 | 4.00 | 1  | MLLT10                                                                                  |
| 215 | chr5:99762015-99977675    | 216 | 4.00 | 1  | FAM174A                                                                                 |
| 216 | chr21:37503499-37619014   | 116 | 3.99 | 1  | DSCR3                                                                                   |
| 217 | chr7:118665467-118883416  | 218 | 3.97 | 0  |                                                                                         |
| 218 | chr11:120721267-120821267 | 100 | 3.96 | 0  |                                                                                         |
| 219 | chr3:108823269-108937391  | 114 | 3.96 | 1  | BBX                                                                                     |
| 220 | chr1:153198332-153306921  | 109 | 3.94 | 10 | PYGO2, SHC1, CKS1B, FLAD1, LENEPI, ZBTB7B, DCST2, DCST1, ADAM15, EFNA4                  |
| 221 | chr3:190084486-190227443  | 143 | 3.94 | 0  |                                                                                         |
| 222 | chr5:24698962-24836371    | 137 | 3.93 | 0  |                                                                                         |
| 223 | chr2:21894744-22002427    | 108 | 3.93 | 0  |                                                                                         |
| 224 | chr5:134071831-134171831  | 100 | 3.93 | 3  | SEC24A, CAMLG, DDX46                                                                    |
| 225 | chr11:22547793-22647793   | 100 | 3.92 | 2  | FANCF, GAS2                                                                             |
| 226 | chr8:72021632-72167150    | 146 | 3.92 | 0  |                                                                                         |
| 227 | chr4:70563870-70700911    | 137 | 3.91 | 1  | SULT1B1                                                                                 |
| 228 | chr9:32630443-32798898    | 168 | 3.91 | 1  | TMEM215                                                                                 |
| 229 | chr12:55560763-55668008   | 107 | 3.88 | 2  | SDR-O, RDH16                                                                            |
| 230 | chr17:4724989-4916850     | 192 | 3.87 | 12 | MINK1, CHRNE, GP1BA, SLC25A11, RNF167, PFN1, ENO3, SPAG7, CAMTA2, INCA1, KIF1C, GPR172B |
| 231 | chr4:113347053-113447053  | 100 | 3.87 | 3  | C4orf16, TIFA, ALPK1                                                                    |
| 232 | chr6:7034815-7166406      | 132 | 3.87 | 1  | RREB1                                                                                   |
| 233 | chr3:49121136-49361236    | 240 | 3.87 | 8  | USP19, LAMB2, CCDC71, KLHDC8B, LOC646498, CCDC36, C3orf62, USP4                         |
| 234 | chr1:116397280-116513106  | 116 | 3.86 | 2  | SLC22A15, C1orf161                                                                      |
| 235 | chr11:76655222-76755222   | 100 | 3.86 | 2  | GDPD4, PAK1                                                                             |
| 236 | chr12:18704919-18804919   | 100 | 3.86 | 2  | PLCZ1, CAPZA3                                                                           |
| 237 | chr3:76034636-76192189    | 158 | 3.85 | 0  |                                                                                         |
| 238 | chr2:191934437-192037572  | 103 | 3.85 | 1  | MYO1B                                                                                   |
| 239 | chr4:151481457-151585884  | 104 | 3.84 | 1  | LRBA                                                                                    |
| 240 | chr4:38882719-39070335    | 188 | 3.84 | 2  | WDR19, RFC1                                                                             |
| 241 | chr2:81671643-81824573    | 153 | 3.83 | 0  |                                                                                         |
| 242 | chr1:92825740-92961962    | 136 | 3.83 | 1  | EVI5                                                                                    |
| 243 | chr5:21089799-21201056    | 111 | 3.83 | 0  |                                                                                         |



|     |                           |     |      |   |                                                                |
|-----|---------------------------|-----|------|---|----------------------------------------------------------------|
| 244 | chr18:9057562-9218306     | 161 | 3.82 | 2 | NDUFV2, ANKRD12                                                |
| 245 | chr13:19255353-19390879   | 136 | 3.80 | 1 | ZMYM5                                                          |
| 246 | chr15:43096138-43196138   | 100 | 3.80 | 3 | SORD, DUOX2, DUOX2A2                                           |
| 247 | chr3:50159130-50275841    | 117 | 3.78 | 4 | SEMA3F, GNAT1, SLC38A3, GNAI2                                  |
| 248 | chr2:123277111-123377111  | 100 | 3.77 | 0 |                                                                |
| 249 | chr10:510172-774229       | 264 | 3.77 | 1 | DIP2C                                                          |
| 250 | chr8:100844697-101001323  | 157 | 3.75 | 2 | VPS13B, COX6C                                                  |
| 251 | chr6:15259758-15367176    | 107 | 3.74 | 1 | JARID2                                                         |
| 252 | chr5:11778395-11904562    | 126 | 3.74 | 1 | CTNND2                                                         |
| 253 | chr5:30561813-30715403    | 154 | 3.73 | 0 |                                                                |
| 254 | chr15:61652432-61832476   | 180 | 3.71 | 3 | USP3, FBXL22, HERC1                                            |
| 255 | chr5:111192852-111292852  | 100 | 3.71 | 0 |                                                                |
| 256 | chr12:78400289-78560786   | 160 | 3.70 | 1 | PAWR                                                           |
| 257 | chr6:126646936-127062588  | 416 | 3.68 | 1 | C6orf173                                                       |
| 258 | chr1:178599787-178711103  | 111 | 3.68 | 1 | ACBD6                                                          |
| 259 | chr5:99559919-99698857    | 139 | 3.67 | 0 |                                                                |
| 260 | chr2:63997751-64143531    | 146 | 3.67 | 1 | VPS54                                                          |
| 261 | chr12:42491863-42614756   | 123 | 3.67 | 1 | TMEM117                                                        |
| 262 | chr11:60782100-60986304   | 204 | 3.66 | 8 | VWCE, DDB1, DAK, CYBASC3, TMEM138, TMEM216, FLJ12529, C11orf79 |
| 263 | chr10:86943502-87111961   | 168 | 3.66 | 0 |                                                                |
| 264 | chr10:65531300-65661430   | 130 | 3.64 | 0 |                                                                |
| 265 | chr3:38418216-38557515    | 139 | 3.64 | 3 | XYLB, ACVR2B, ENDOGL1                                          |
| 266 | chr6:58625121-58725121    | 100 | 3.63 | 0 |                                                                |
| 267 | chr10:24098364-24213025   | 115 | 3.62 | 1 | KIAA1217                                                       |
| 268 | chr11:91680137-91805571   | 125 | 3.62 | 1 | FAT3                                                           |
| 269 | chr16:2081735-2185557     | 104 | 3.62 | 4 | PKD1, RAB26, TRAF7, CASKIN1                                    |
| 270 | chr2:73860072-73962402    | 102 | 3.59 | 3 | DUSP11, FLJ43987, STAMBP                                       |
| 271 | chr2:17703186-17849261    | 146 | 3.59 | 2 | SMC6, GEN1                                                     |
| 272 | chr20:35382039-35482039   | 100 | 3.59 | 1 | SRC                                                            |
| 273 | chr1:146183191-146298908  | 116 | 3.59 | 0 |                                                                |
| 274 | chr2:148559224-148681014  | 122 | 3.57 | 0 |                                                                |
| 275 | chr9:130084933-130226839  | 142 | 3.57 | 6 | C9orf119, TRUB2, COQ4, SLC27A4, URM1, CERCAM                   |
| 276 | chr11:20341684-20488999   | 147 | 3.57 | 2 | HTATIP2, PRMT3                                                 |
| 277 | chr14:106059588-106159588 | 100 | 3.56 | 0 |                                                                |
| 278 | chr12:12171446-12293333   | 122 | 3.54 | 2 | BCL2L14, LRP6                                                  |
| 279 | chr2:21693084-21793084    | 100 | 3.54 | 0 |                                                                |
| 280 | chr16:60649093-60749093   | 100 | 3.53 | 0 |                                                                |
| 281 | chr3:49984343-50140249    | 156 | 3.52 | 2 | RBM6, RBM5                                                     |
| 282 | chr19:44458940-44603354   | 144 | 3.52 | 8 | IL29, LRFN1, GMFG, SAMD4B, PAF1, MED29, ZFP36, PLEKHG2         |
| 283 | chr17:53374925-53490256   | 115 | 3.51 | 2 | VEZF1, SFRS1                                                   |
| 284 | chr20:7035757-7140997     | 105 | 3.48 | 0 |                                                                |
| 285 | chr2:190184469-190320953  | 136 | 3.47 | 3 | ASNSD1, ANKAR, OSGEPL1                                         |
| 286 | chr6:77092051-77203728    | 112 | 3.47 | 0 |                                                                |
| 287 | chr10:59251617-59351617   | 100 | 3.46 | 0 |                                                                |
| 288 | chr22:27333003-27433003   | 100 | 3.44 | 1 | CHEK2                                                          |
| 289 | chr20:30948926-31048926   | 100 | 3.39 | 1 | SPAG4L                                                         |

|     |                          |     |      |   |                                                                        |
|-----|--------------------------|-----|------|---|------------------------------------------------------------------------|
| 290 | chr2:177707009-177844073 | 137 | 3.37 | 2 | HNRNPA3, NFE2L2                                                        |
| 291 | chr7:120220572-120399549 | 179 | 3.36 | 2 | TSPAN12, ING3                                                          |
| 292 | chr1:191573307-191700187 | 127 | 3.33 | 0 |                                                                        |
| 293 | chr13:19031017-19161340  | 130 | 3.29 | 1 | MPHOSPH8                                                               |
| 294 | chr16:14435797-14566760  | 131 | 3.27 | 1 | PARN                                                                   |
| 295 | chr4:119132533-119269939 | 137 | 3.27 | 1 | NDST3                                                                  |
| 296 | chr1:92554157-92713125   | 159 | 3.27 | 2 | RPAP2, GFI1                                                            |
| 297 | chr1:148102207-148202207 | 100 | 3.27 | 8 | HIST2H2BE, HIST2H2AC, HIST2H2AB,<br>BOLA1, SV2A, SF3B4, MTMR11, OTUD7B |
| 298 | chr6:101707195-101825358 | 118 | 3.25 | 0 |                                                                        |
| 299 | chr7:110897132-111017780 | 121 | 3.23 | 1 | IMMP2L                                                                 |
| 300 | chr7:138669713-138769713 | 100 | 3.19 | 2 | C7orf55, LUC7L2                                                        |
| 301 | chr1:210518780-210622483 | 104 | 3.11 | 2 | PPP2R5A, TMEM206                                                       |
| 302 | chr15:28758580-28858580  | 100 | 3.11 | 0 |                                                                        |
| 303 | chr16:45855281-45955281  | 100 | 3.11 | 1 | ITFG1                                                                  |
| 304 | chr16:46448606-46548606  | 100 | 3.10 | 0 |                                                                        |
| 305 | chr1:25510488-25610488   | 100 | 3.00 | 3 | RHD, TMEM50A, RHCE                                                     |

**Table S6. Gene content of CMS<sub>GW</sub> regions**

Gene counts for candidate regions of natural selection found by CMS

| <i>Population</i>           | <i>#<br/>Regions</i> | <i>Median<br/>region<br/>size</i> | <i># RefSeq<br/>Genes<br/>(avg)</i> | <i># RefSeq<br/>Genes<br/>(sd)</i> | <i>0<br/>Genes</i> | <i>1<br/>Gene</i> | <i>LINC</i> | <i>only<br/>LINC*</i> |
|-----------------------------|----------------------|-----------------------------------|-------------------------------------|------------------------------------|--------------------|-------------------|-------------|-----------------------|
| BEB                         | 305                  | 149                               | 2.33                                | 3.65                               | 72                 | 95                | 91          | 29                    |
| North/West<br>European      | 233                  | 144                               | 2.01                                | 2.51                               | 55                 | 76                | 67          | 23                    |
| Japanese and Han<br>Chinese | 254                  | 128                               | 1.53                                | 2.05                               | 79                 | 92                | 71          | 25                    |
| Yoruban from<br>Nigeria     | 130                  | 125                               | 2.07                                | 2.21                               | 23                 | 45                | 26          | 9                     |

\* Regions with at least one LINC and no RefSeq genes

**Table S7. INRICH gene set enrichment analysis**

All INRICH gene sets with  $p_{\text{set}} < 0.05$  in any of the four CMS populations

| TARGET                                                                               | BEB  |                  |                  | CEU |                  |                  | JPT/CHB |                  |                  | YRI |                  |                  |   |
|--------------------------------------------------------------------------------------|------|------------------|------------------|-----|------------------|------------------|---------|------------------|------------------|-----|------------------|------------------|---|
|                                                                                      | rank | $p_{\text{set}}$ | $p_{\text{exp}}$ | #   | $p_{\text{set}}$ | $p_{\text{exp}}$ | #       | $p_{\text{set}}$ | $p_{\text{exp}}$ | #   | $p_{\text{set}}$ | $p_{\text{exp}}$ | # |
| <b>1. Molecular Signatures Database MSigDB.c4 (851 gene sets with &gt; 10 genes)</b> |      |                  |                  |     |                  |                  |         |                  |                  |     |                  |                  |   |
| MORF_IKBKG (110 genes)                                                               | 1    | 0.00005          | 0.017            | 15  |                  |                  |         |                  |                  |     |                  |                  |   |
| module_85 (47 genes)                                                                 |      |                  |                  |     |                  |                  |         | <b>0.00009</b>   | <b>0.027</b>     | 7   |                  |                  |   |
| module_259 (42 genes)                                                                |      |                  |                  |     |                  |                  |         | 0.00018          | 0.050            | 6   |                  |                  |   |
| module_199 (53 genes)                                                                |      |                  |                  |     |                  |                  |         | 0.00019          | 0.053            | 7   |                  |                  |   |
| MORF_FDXR (198 genes)                                                                | 2    | 0.00024          | 0.074            | 18  |                  |                  |         | 0.02660          | 0.997            | 9   |                  |                  |   |
| module_514 (10 genes)                                                                |      |                  |                  |     |                  |                  |         | 0.00028          | 0.075            | 3   |                  |                  |   |
| MORF_PHB (108 genes)                                                                 | 3    | 0.00067          | 0.183            | 12  |                  |                  |         |                  |                  |     |                  |                  |   |
| MORF_ORC1L (56 genes)                                                                | 4    | 0.00121          | 0.313            | 9   |                  |                  |         |                  |                  |     |                  |                  |   |
| MORF_PPP1CA (144 genes)                                                              |      |                  |                  |     | 0.00164          | 0.366            | 10      |                  |                  |     |                  |                  |   |
| GNF2_RFC3 (38 genes)                                                                 |      |                  |                  |     |                  |                  |         |                  |                  |     | 0.00213          | 0.402            | 4 |
| MORF_RAD21 (154 genes)                                                               |      |                  |                  |     | 0.00208          | 0.443            | 11      |                  |                  |     |                  |                  |   |
| module_102 (15 genes)                                                                |      |                  |                  |     |                  |                  |         |                  |                  |     | 0.00246          | 0.451            | 3 |
| MORF_PML (122 genes)                                                                 | 5    | 0.00209          | 0.458            | 12  |                  |                  |         |                  |                  |     |                  |                  |   |
| GCM_PPM1D (22 genes)                                                                 | 6    | 0.00219          | 0.470            | 5   |                  |                  |         |                  |                  |     |                  |                  |   |
| module_286 (35 genes)                                                                |      |                  |                  |     |                  |                  |         | 0.00252          | 0.485            | 4   |                  |                  |   |
| MORF_CSNK2B (250 genes)                                                              |      |                  |                  |     | 0.00263          | 0.514            | 14      |                  |                  |     |                  |                  |   |
| GNF2_MYD88 (54 genes)                                                                |      |                  |                  |     |                  |                  |         | 0.00319          | 0.561            | 5   |                  |                  |   |
| module_93 (174 genes)                                                                |      |                  |                  |     |                  |                  |         | 0.00354          | 0.600            | 9   |                  |                  |   |
| module_350 (55 genes)                                                                |      |                  |                  |     | 0.00349          | 0.611            | 5       |                  |                  |     |                  |                  |   |
| MORF_DDX11 (134 genes)                                                               | 7    | 0.00342          | 0.625            | 13  |                  |                  |         |                  |                  |     |                  |                  |   |
| <b>2. Gene Ontology gene sets (2,430 gene sets with &gt; 10 genes)</b>               |      |                  |                  |     |                  |                  |         |                  |                  |     |                  |                  |   |
| GO:0005925 Focal adhesion (101 genes)                                                |      |                  |                  |     |                  |                  |         | 0.00062          | 0.388            | 9   |                  |                  |   |
| GO:0005516 Calmodulin binding (134 genes)                                            |      |                  |                  |     |                  |                  |         |                  |                  |     | 0.00142          | 0.630            | 8 |
| GO:0042438 Melanin biosynthetic process (10 genes)                                   |      |                  |                  |     | 0.00149          | 0.697            | 3       |                  |                  |     |                  |                  |   |
| GO:0030672 Synaptic vesicle membrane (43 genes)                                      |      |                  |                  |     |                  |                  |         |                  |                  |     | 0.00178          | 0.704            | 4 |
| GO:0034660 ncRNA metabolic process (22 genes)                                        |      |                  |                  |     |                  |                  |         |                  |                  |     | 0.00194          | 0.734            | 3 |
| GO:0045777 Positive regulation of blood pressure (21 genes)                          |      |                  |                  |     |                  |                  |         | 0.00177          | 0.764            | 3   |                  |                  |   |
| GO:0007243 Intracellular protein kinase cascade (88 genes)                           | 1    | 0.00175          | 0.772            | 11  |                  |                  |         |                  |                  |     |                  |                  |   |
| GO:0008076 Voltage-gated potassium                                                   |      |                  |                  |     |                  |                  |         |                  |                  |     | 0.00221          | 0.775            | 6 |

|                                                                                                        |   |         |       |   |         |       |    |         |       |         |       |    |  |
|--------------------------------------------------------------------------------------------------------|---|---------|-------|---|---------|-------|----|---------|-------|---------|-------|----|--|
| channel complex (89 genes)                                                                             |   |         |       |   |         |       |    |         |       |         |       |    |  |
| GO:0051593 Response to folic acid (10 genes)                                                           | 2 | 0.00198 | 0.808 | 3 |         |       |    |         |       |         |       |    |  |
| GO:0042787 Protein ubiquitination involved in ubiquitin-dependent protein catabolic process (45 genes) |   |         |       |   | 0.00225 | 0.838 | 7  |         |       | 0.01911 | 1.000 | 4  |  |
| GO:0016070 RNA metabolic process (249 genes)                                                           |   |         |       |   |         |       |    |         |       | 0.00305 | 0.865 | 10 |  |
| GO:0016747 Transferase activity, transferring acyl groups other than amino-acyl groups (45 genes)      |   |         |       |   |         |       |    | 0.00281 | 0.886 | 5       |       |    |  |
| GO:0000387 Spliceosomal snRNP assembly (25 genes)                                                      |   |         |       |   |         |       |    |         |       | 0.00332 | 0.887 | 3  |  |
| GO:0004812 Aminoacyl-tRNA ligase activity (37 genes)                                                   |   |         |       |   |         |       |    |         |       | 0.00333 | 0.888 | 4  |  |
| GO:0005903 Brush border (26 genes)                                                                     |   |         |       |   | 0.00299 | 0.904 | 4  |         |       |         |       |    |  |
| GO:0048066 Developmental pigmentation (15 genes)                                                       |   |         |       |   | 0.00393 | 0.953 | 3  |         |       |         |       |    |  |
| GO:0003779 Actin binding (259 genes)                                                                   |   |         |       |   | 0.00411 | 0.958 | 16 |         |       |         |       |    |  |
| GO:0016881 Acid-amino acid ligase activity (71 genes)                                                  |   |         |       |   | 0.00422 | 0.962 | 8  |         |       |         |       |    |  |
| GO:0007626 Locomotory behavior (72 genes)                                                              | 3 | 0.00411 | 0.964 | 8 |         |       |    |         |       |         |       |    |  |
| GO:0006464 Protein modification process (139 genes)                                                    |   |         |       |   | 0.00501 | 0.977 | 11 |         |       | 0.02329 | 1.000 | 6  |  |

**3. Gene Ontology gene sets (2,430 gene sets with > 10 genes) in regions with CMS > 5**

|                                                           |   |         |       |   |         |       |   |         |       |         |       |   |  |
|-----------------------------------------------------------|---|---------|-------|---|---------|-------|---|---------|-------|---------|-------|---|--|
| GO:0007626 Locomotory behavior (72 genes)                 | 1 | 0.00004 | 0.027 | 7 |         |       |   |         |       |         |       |   |  |
| GO:0042438 Melanin biosynthetic process (10 genes)        |   |         |       |   | 0.00016 | 0.109 | 3 |         |       |         |       |   |  |
| GO:0048066 Developmental pigmentation (15 genes)          |   |         |       |   | 0.00062 | 0.370 | 3 |         |       |         |       |   |  |
| GO:0042572 Retinol metabolic process (12 genes)           |   |         |       |   |         |       |   | 0.00213 | 0.729 | 2       |       |   |  |
| GO:0045727 Positive regulation of translation (29 genes)  |   |         |       |   |         |       |   |         |       | 0.00270 | 0.796 | 3 |  |
| GO:0001523 Retinoid metabolic process (11 genes)          |   |         |       |   |         |       |   | 0.00260 | 0.797 | 2       |       |   |  |
| GO:0005844 Polysome (18 genes)                            |   |         |       |   | 0.00305 | 0.866 | 3 |         |       |         |       |   |  |
| GO:0008286 Insulin receptor signaling pathway (131 genes) |   |         |       |   | 0.00325 | 0.879 | 7 |         |       |         |       |   |  |
| GO:0032420 Stereocilium (16 genes)                        | 2 | 0.00338 | 0.889 | 3 |         |       |   |         |       |         |       |   |  |

|                                                                                                    |   |         |       |   |         |       |         |       |   |         |       |   |  |
|----------------------------------------------------------------------------------------------------|---|---------|-------|---|---------|-------|---------|-------|---|---------|-------|---|--|
| GO:0006813 Potassium ion transport (153 genes)                                                     | 3 | 0.00376 | 0.915 | 8 |         |       |         |       |   |         |       |   |  |
| GO:0019841 Retinol binding (12 genes)                                                              |   |         |       |   |         |       | 0.00414 | 0.922 | 2 |         |       |   |  |
| GO:0042800 Histone methyltransferase activity (H3-K4 specific) (11 genes)                          |   |         |       |   |         |       | 0.00440 | 0.934 | 2 |         |       |   |  |
| GO:0008630 DNA damage response, signal transduction resulting in induction of apoptosis (21 genes) |   |         |       |   | 0.00466 | 0.944 | 3       |       |   |         |       |   |  |
| GO:0042254 Ribosome biogenesis (29 genes)                                                          |   |         |       |   |         |       |         |       |   | 0.00548 | 0.962 | 2 |  |
| GO:0005249 Voltage-gated potassium channel activity (81 genes)                                     | 4 | 0.00533 | 0.968 | 6 |         |       |         |       |   |         |       |   |  |
| GO:0007266 Rho protein signal transduction (39 genes)                                              | 5 | 0.00555 | 0.973 | 4 |         |       |         |       |   | 0.03034 | 1.000 | 2 |  |
| GO:0005096 GTPase activator activity (162 genes)                                                   |   |         |       |   |         |       |         |       |   | 0.00618 | 0.974 | 5 |  |
| GO:0008236 Serine-type peptidase activity (58 genes)                                               | 6 | 0.00785 | 0.992 | 4 |         |       |         |       |   |         |       |   |  |
| GO:0034660 NcRNA metabolic process (22 genes)                                                      |   |         |       |   |         |       |         |       |   | 0.00936 | 0.993 | 2 |  |
| GO:0016070 RNA metabolic process (249 genes)                                                       |   |         |       |   |         |       |         |       |   | 0.00948 | 0.993 | 6 |  |

**4. Potassium channel genes**

|                                  |   |         |       |   |  |  |  |  |  |  |  |  |  |
|----------------------------------|---|---------|-------|---|--|--|--|--|--|--|--|--|--|
| 6/7TM-1P EAG, ERG, ELK (8 genes) | 1 | 0.03170 | 0.137 | 3 |  |  |  |  |  |  |  |  |  |
| 6/7TM-1P (47 genes)              | 2 | 0.04636 | 0.177 | 5 |  |  |  |  |  |  |  |  |  |

**5. Potassium channel genes in regions with CMS > 5**

|                                  |   |         |       |   |  |  |  |  |  |  |  |  |  |
|----------------------------------|---|---------|-------|---|--|--|--|--|--|--|--|--|--|
| 6/7TM-1P (47 genes)              | 1 | 0.00165 | 0.008 | 5 |  |  |  |  |  |  |  |  |  |
| 6/7TM-1P EAG, ERG, ELK (8 genes) | 2 | 0.00519 | 0.030 | 3 |  |  |  |  |  |  |  |  |  |

**6. Blood systems**

|                                       |   |         |       |   |  |  |  |         |       |   |  |  |  |
|---------------------------------------|---|---------|-------|---|--|--|--|---------|-------|---|--|--|--|
| Kell and Kell complex genes (8 genes) | 1 | 0.00444 | 0.007 | 3 |  |  |  | 0.02527 | 0.029 | 2 |  |  |  |
|---------------------------------------|---|---------|-------|---|--|--|--|---------|-------|---|--|--|--|

**Table S8. Custom gene sets tested with INRICH**

| Gene set                              | N genes | Genes (autosomal)                                                                                                                                                                                                                                                                                                                         |
|---------------------------------------|---------|-------------------------------------------------------------------------------------------------------------------------------------------------------------------------------------------------------------------------------------------------------------------------------------------------------------------------------------------|
| <b>1. Potassium channel gene sets</b> |         |                                                                                                                                                                                                                                                                                                                                           |
| 2TM-1P                                | 15      | KCNJ1, KCNJ2, KCNJ3, KCNJ4, KCNJ5, KCNJ6, KCNJ8, KCNJ9, KCNJ10, KCNJ11, KCNJ12, KCNJ13, KCNJ14, KCNJ15, KCNJ16                                                                                                                                                                                                                            |
| 6/7TM-1P (voltage gated K+ channels)  | 47      | KCNA1, KCNA2, KCNA3, KCNA4, KCNA5, KCNA6, KCNA7, KCNA10, KCNB1, KCNC1, KCNC2, KCNC3, KCNC4, KCND2, KCND3, KCNF1, KCNG1, KCNH1, KCNH2, KCNMA1, KCNN1, KCNN2, KCNN3, KCNN4, KCNQ1, KCNQ2, KCNQ3, KCNS1, KCNS2, KCNS3, KCNQ4, KCNB2, KCNH4, KCNH3, KCNG2, KCNV1, KCNH5, KCNQ5, KCNT1, KCNH6, KCNH7, KCNG4, KCNH8, KCNU1, KCNV2, KCNG3, KCNT2 |
| 6/7TM-1P EAG, ERG, ELK                | 8       | KCNH1, KCNH2, KCNH4, KCNH3, KCNH5, KCNH6, KCNH7, KCNH8                                                                                                                                                                                                                                                                                    |
| 6/7TM-1P KCNQ                         | 5       | KCNQ1, KCNQ2, KCNQ3, KCNQ4, KCNQ5                                                                                                                                                                                                                                                                                                         |
| 6/7TM-1P Modifier                     | 10      | KCNF1, KCNG1, KCNS1, KCNS2, KCNS3, KCNG2, KCNV1, KCNG4, KCNV2, KCNG3                                                                                                                                                                                                                                                                      |
| 6/7TM-1P SK/IK (calcium activated)    | 4       | KCNN1, KCNN2, KCNN3, KCNN4                                                                                                                                                                                                                                                                                                                |
| 6/7TM-1P Shab                         | 2       | KCNB1, KCNB2                                                                                                                                                                                                                                                                                                                              |
| 6/7TM-1P Shaker                       | 8       | KCNA1, KCNA2, KCNA3, KCNA4, KCNA5, KCNA6, KCNA7, KCNA10                                                                                                                                                                                                                                                                                   |
| 6/7TM-1P Shal                         | 2       | KCND2, KCND3                                                                                                                                                                                                                                                                                                                              |
| 6/7TM-1P Shaw                         | 4       | KCNC1, KCNC2, KCNC3, KCNC4                                                                                                                                                                                                                                                                                                                |
| 6/7TM-1P Slo (calcium activated)      | 4       | KCNMA1, KCNT1, KCNU1, KCNT2                                                                                                                                                                                                                                                                                                               |
| ATM-2P                                | 15      | KCNK1, KCNK2, KCNK3, KCNK5, KCNK6, KCNK7, KCNK4, KCNK9, KCNK10, KCNK13, KCNK12, KCNK15, KCNK16, KCNK17, KCNK18                                                                                                                                                                                                                            |
| ATM-2P acid sensitive                 | 8       | KCNK2, KCNK3, KCNK5, KCNK4, KCNK9, KCNK10, KCNK16, KCNK17                                                                                                                                                                                                                                                                                 |
| accessory subunits                    | 11      | KCNE1, KCNMB1, KCNAB1, KCNAB2, KCNAB3, KCNE2, KCNE3, KCNMB2, KCNE4, KCNMB3, KCNMB4                                                                                                                                                                                                                                                        |
| accessory subunits KCNA associated    | 3       | KCNAB1, KCNAB2, KCNAB3                                                                                                                                                                                                                                                                                                                    |
| accessory subunits KCNMA1-associated  | 4       | KCNMB1, KCNMB2, KCNMB3, KCNMB4                                                                                                                                                                                                                                                                                                            |
| accessory subunits KCNQ1-associated   | 4       | KCNE1, KCNE2, KCNE3, KCNE4                                                                                                                                                                                                                                                                                                                |
| <b>2. Blood group systems</b>         |         |                                                                                                                                                                                                                                                                                                                                           |
| ABO                                   | 1       | ABO                                                                                                                                                                                                                                                                                                                                       |
| Chido/Rodgers                         | 4       | C4A, C4A, C4B, C4B                                                                                                                                                                                                                                                                                                                        |
| Colton                                | 1       | AQP1                                                                                                                                                                                                                                                                                                                                      |
| Cromer                                | 1       | CD55                                                                                                                                                                                                                                                                                                                                      |
| Diego                                 | 1       | SLC4A1                                                                                                                                                                                                                                                                                                                                    |
| Dombrock                              | 1       | ART4                                                                                                                                                                                                                                                                                                                                      |
| Duffy                                 | 1       | DARC                                                                                                                                                                                                                                                                                                                                      |
| FY                                    | 1       | DARC                                                                                                                                                                                                                                                                                                                                      |
| Gerbich                               | 1       | GYPC                                                                                                                                                                                                                                                                                                                                      |
| Gill                                  | 1       | AQP3                                                                                                                                                                                                                                                                                                                                      |
| Globoside                             | 1       | B3GALNT1                                                                                                                                                                                                                                                                                                                                  |
| H                                     | 2       | FUT1, FUT2                                                                                                                                                                                                                                                                                                                                |

|                             |   |                                               |
|-----------------------------|---|-----------------------------------------------|
| I                           | 1 | GCNT2                                         |
| Indian                      | 1 | CD44                                          |
| JK                          | 1 | SLC14A1                                       |
| John Milton Hagen           | 1 | SEMA7A                                        |
| Junior                      | 1 | ABCG2                                         |
| Kell                        | 1 | KEL                                           |
| Kell and Kell complex genes | 8 | KEL, XKR3, XKR4, XKR5, XKR6, XKR7, XKR8, XKR9 |
| Kidd                        | 2 | SLC14A1, SLC1A1                               |
| Knops                       | 1 | CR1                                           |
| Lan                         | 1 | ABCB6                                         |
| Lewis                       | 4 | FUT2, FUT3, FUT6, FUT7                        |
| Lutheran                    | 2 | BCAM, KLF1                                    |
| Landsteiner-Wiener          | 1 | ICAM4                                         |
| MNS                         | 3 | GYP A, GYP B, GYP E                           |
| OK                          | 1 | BSG                                           |
| PIPK and Globoside          | 2 | A4GALT, B3GALNT1                              |
| PIPK                        | 1 | A4GALT                                        |
| RAPH                        | 1 | CD151                                         |
| RH                          | 5 | RHAG, RHBG, RHCE, RHCG, RHD                   |
| Rh-associated glycoprotein  | 1 | RHAG                                          |
| Rodgers                     | 2 | C4A, C4A                                      |
| Scianna                     | 1 | ERMAP                                         |
| T/Tn                        | 1 | C1GALT1                                       |
| YT (Cartwright)             | 1 | ACHE                                          |



**Table S9. Regions included in association study.**

| CMS region | CMS score | region                    | # SNPs * | # var. SNPs ** | # repl. SNP <sup>†</sup> | reason                    | name (fig 3) | Genes tested for association                                   |
|------------|-----------|---------------------------|----------|----------------|--------------------------|---------------------------|--------------|----------------------------------------------------------------|
| 305        | 3.00      | chr1:25510488..25610488   | 8        | 4              |                          | blood group genes         | 1(1)         | RHCE, RHD                                                      |
| 26         | 6.45      | chr1:205127559..205227559 | 23       | 18             | 1 / 5                    | immune related genes      | 1(2)         | FAIM3, FCAMR, IL24, PIGR                                       |
| 72         | 5.23      | chr2:9290239..9689347     | 24       | 18             | 4 / 22                   | immune related genes      | 2(1)         | ADAM17, IAH1                                                   |
| 21         | 6.75      | chr2:60957829..61241691   | 14       | 10             | 3 / 8                    | immune related genes      | 2(2)         | REL                                                            |
| 7          | 8.30      | chr2:72556447..72934657   | 1        | 1              |                          | among top 10 CMS regions  | 2(3)         | EXOC6B                                                         |
| 39         | 6.05      | chr2:74441365..74643702   | 7        | 4              |                          | MORF IKBKG genes          | 2(4)         | DOK1, LOXL3, PCGF1                                             |
| 1          | 12.65     | chr2:96204472..96450166   | 65       | 38             | 6 / 27                   | among top 10 CMS regions  | 2(5)         | CIAO1, LOC285033, NCAPH, SNRNP200, STARD7, TMEM127             |
| 20         | 6.80      | chr2:96476699..96981116   | 8        | 5              |                          | immune related genes      | 2(6)         | LMAN2L                                                         |
| 8          | 7.74      | chr2:163254213..163942575 | 20       | 19             | 4 / 12                   | among top 10 CMS regions  | 2(7)         | KCNH7                                                          |
| 204        | 4.02      | chr4:123581338..123726077 | 4        | 3              |                          | immune related genes      | 4            | IL2                                                            |
| 99         | 4.92      | chr6:31703901..31815903   | 27       | 25             |                          | immune related genes      | 6            | BAT2, BAT3, BAT4, BAT5, CSNK2B, LY6G5B, LY6G5C, LY6G6C, LY6G6D |
| 11         | 7.52      | chr7:65591573..65901445   | 4        | 4              | 1                        | potassium channel gene(s) | 7(1)         | KCTD7, RABGEF1                                                 |
| 9          | 7.70      | chr7:119120356..120210059 | 2        | 1              |                          | among top 10 CMS regions  | 7(2)         | KCND2                                                          |
| 92         | 4.98      | chr7:142353741..142588076 | 6        | 2              |                          | blood group genes         | 7(3)         | KEL                                                            |
| 62         | 5.51      | chr7:148319871..148502995 | 19       | 13             |                          | immune related genes      | 7(4)         | PDIA4                                                          |
| 6          | 8.77      | chr8:8110844..8211017     | 1        | 1              |                          | among top 10 CMS regions  | 8(1)         | <i>no genes</i>                                                |
| 143        | 4.54      | chr8:71606476..71773595   | 5        | 4              | 1 / 3                    | blood group genes         | 8(2)         | XKR9                                                           |
| 136        | 4.58      | chr9:122799711..123110846 | 14       | 13             |                          | immune related genes      | 9            | C5                                                             |
| 4          | 9.02      | chr10:45284677..45384677  | 33       | 22             |                          | among top 10 CMS regions  | 10           | MARCH8                                                         |

|                             |      |                          |     |     |          |                          |       |                                                                                               |
|-----------------------------|------|--------------------------|-----|-----|----------|--------------------------|-------|-----------------------------------------------------------------------------------------------|
| 183                         | 4.22 | chr11:60470408..60570408 | 4   | 4   | 2        | immune related genes     | 11(1) | CD6                                                                                           |
| 59                          | 5.54 | chr11:66031159..66257760 | 4   | 4   |          | immune related genes     | 11(2) | CTSF                                                                                          |
| 31                          | 6.41 | chr11:66560041..67041927 | 15  | 7   | 3 / 13   | MORF IKBKG genes         | 11(3) | PITPNM1, RPS6KB2                                                                              |
| 10                          | 7.57 | chr14:62443764..63110864 | 35  | 32  |          | among top 10 CMS regions | 14    | KCNH5                                                                                         |
| 5                           | 8.97 | chr16:30312959..31301270 | 79  | 54  | 5 / 43   | among top 10 CMS regions | 16(1) | BCKDK, CTF1, ITGAL, ITGAM, ITGAX, MYST1, ORAI3, PYCARD, PYDC1, SEPHS2, TRIM72, ZNF768, ZNF785 |
| 131                         | 4.62 | chr16:46765699..46865699 | 5   | 2   |          | immune related genes     | 16(2) | ABCC11                                                                                        |
| 60                          | 5.53 | chr19:11395725..11567995 | 9   | 5   |          | MORF IKBKG genes         | 19    | PRKCSH                                                                                        |
| 152                         | 4.47 | chr20:29940726..30118633 | 4   | 4   |          | blood group genes        | 20(1) | XKR7                                                                                          |
| 3                           | 9.30 | chr20:47858175..48083964 | 36  | 34  | 2 / 5    | among top 10 CMS regions | 20(2) | SLC9A8, SNAI1, SPATA2                                                                         |
| <i>random selected SNPs</i> |      |                          | 19  | 19  | 11       |                          |       |                                                                                               |
| <b>TOTAL</b>                |      |                          | 495 | 370 | 55 / 204 |                          |       |                                                                                               |

\* SNPs with genotyping rates > 75% across individuals with genotyping rates > 75%

\*\* SNPs with minor allele frequency > 1%

† replication SNPs (genotyped / genotyped + imputed)

**Table S10. Association study results**

| region | chr | Association #1 (all cases) |           |                          |                         | Association #1 (severe cases) |           |                          | Replication              |               |
|--------|-----|----------------------------|-----------|--------------------------|-------------------------|-------------------------------|-----------|--------------------------|--------------------------|---------------|
|        |     | SNP                        | position  | <i>p</i> <sub>DFAM</sub> | <i>p</i> <sub>TDT</sub> | SNP                           | position  | <i>p</i> <sub>DFAM</sub> | haplotype block          | <i>p</i>      |
| 1(1)   | 1   | rs2765572                  | 25529815  | 0.1577                   | 0.3173                  | rs2765572                     | 25529815  | 0.2987                   |                          |               |
| 1(2)   | 1   | rs1856746                  | 205210045 | 0.3228                   | 0.5637                  | rs11119925                    | 205202614 | 0.1094                   | chr1:205199163-205199163 | 0.1115        |
| 2(1)   | 2   | rs6432017                  | 9611326   | 0.1684                   | 0.2393                  | rs6432017                     | 9611326   | 0.1274                   | chr2:9547467-9614823     | 0.0806        |
| 2(2)   | 2   | rs9309331                  | 60995119  | 0.1263                   | 0.2482                  | rs842620                      | 60980129  | 0.1127                   | chr2:60966056-60987297   | 0.1251        |
| 2(3)   | 2   | rs4852873                  | 72606447  | 0.7166                   | 0.1573                  | rs4852873                     | 72606447  | 0.7175                   |                          |               |
| 2(4)   | 2   | rs3806607                  | 74589122  | 0.1097                   | 0.4795                  | rs13416172                    | 74635379  | 0.3061                   |                          |               |
| 2(5)   | 2   | rs62153901                 | 96347686  | <b>0.0015</b>            | <b>0.0278</b>           | rs62153901                    | 96347686  | <b>0.0026</b>            | chr2:96254472-96397667   | <b>0.0064</b> |
| 2(6)   | 2   | rs10189727                 | 96750553  | <b>0.0299</b>            | 0.0881                  | rs10189727                    | 96750553  | 0.1775                   |                          |               |
| 2(7)   | 2   | rs10199249                 | 163279790 | 0.0822                   | <b>0.0495</b>           | rs1273201                     | 163344431 | <b>0.0194</b>            | chr2:163273563-163304213 | <b>0.0409</b> |
| 4(1)   | 4   | rs2069778                  | 123595585 | 0.1233                   | 0.6547                  | rs2069776                     | 123591426 | 0.0761                   |                          |               |
| 6(1)   | 6   | rs9469042                  | 31790997  | <b>0.0187</b>            | <b>0.0254</b>           | rs9267532                     | 31747958  | 0.1282                   |                          |               |
| 7(1)   | 7   | rs1267818                  | 65744459  | 0.1573                   | 0.2008                  | rs1638735                     | 65733173  | 0.0927                   |                          |               |
| 7(2)   | 7   | rs4730954                  | 119704394 | 0.7371                   | 0.7815                  | rs4730954                     | 119704394 | 0.4511                   |                          |               |
| 7(3)   | 7   | rs3757853                  | 142360597 | 0.4405                   | 0.5127                  | rs3757853                     | 142360597 | 0.4740                   |                          |               |
| 7(4)   | 7   | rs56932055                 | 148347253 | 0.3687                   | 0.5637                  | rs6464933                     | 148354807 | 0.3940                   |                          |               |
| 8(1)   | 8   | rs951702                   | 8161017   | 0.9410                   | 1.0000                  | rs951702                      | 8161017   | 0.9309                   |                          |               |
| 8(2)   | 8   | rs6472538                  | 71749525  | 0.0740                   | 0.1088                  | rs6472538                     | 71749525  | 0.4075                   | chr8:71749525-71764563   | 0.2230        |
| 9(1)   | 9   | rs2300934                  | 122848784 | <b>0.0273</b>            | 0.2623                  | rs2300934                     | 122848784 | <b>0.0240</b>            | chr9:122797008-122848784 | <b>0.0027</b> |
| 10(1)  | 10  | rs1906284                  | 45297609  | 0.0585                   | 0.2393                  | rs1906284                     | 45297609  | 0.0574                   | chr10:45297609-45441052  | 0.0889        |
| 11(1)  | 11  | rs3019561                  | 60500429  | 0.0820                   | 0.1655                  | rs2074229                     | 60539684  | 0.3248                   |                          |               |
| 11(2)  | 11  | rs2242663                  | 66091884  | 0.6450                   | 0.8084                  | rs13897                       | 66087745  | 0.5275                   |                          |               |
| 11(3)  | 11  | rs10274                    | 66959402  | 0.2120                   | <b>0.0412</b>           | rs10274                       | 66959402  | <b>0.0486</b>            | chr11:66956282-66991927  | <b>0.0061</b> |
| 14(1)  | 14  | rs6573480                  | 62613774  | <b>0.0452</b>            | 0.0736                  | rs1951805                     | 62637907  | <b>0.0356</b>            | chr14:62449574-62476691  | 0.0618        |
| 16(1)  | 16  | rs13337037                 | 31386212  | 0.0690                   | 0.0881                  | rs10871453                    | 30444419  | 0.0852                   | chr16:30918684-31055049  | <b>0.0005</b> |
| 16(4)  | 16  | rs12443685                 | 46783980  | 0.6170                   | 0.6374                  | rs12443685                    | 46783980  | 0.2622                   |                          |               |
| 19(1)  | 19  | rs313624                   | 11413910  | 0.0693                   | 0.0833                  | rs313624                      | 11413910  | 0.0959                   |                          |               |
| 20(1)  | 20  | rs754568                   | 30033526  | 0.3282                   | 0.7963                  | rs6121302                     | 30031338  | 0.2779                   |                          |               |
| 20(2)  | 20  | rs73271169                 | 47940104  | 0.1239                   | <b>0.0184</b>           | rs6020178                     | 48037347  | 0.1811                   | chr20:47921264-47921264  | 0.5238        |

**Table S11. Overlap between IBD GWAS loci and BEB selected regions**

A. Summary of overlap between BEB CMS regions and IBD GWAS regions (60)

| Set                          | # GWAS regions | # GWAS genes | overlapping selected regions | P <sub>set</sub> | P <sub>exp</sub> |
|------------------------------|----------------|--------------|------------------------------|------------------|------------------|
| Crohn's Disease              | 64             | 502          | 8                            | 0.42             | 0.60             |
| Crohn's Disease (p<1e-10)    | 25             | 248          | 6                            | 0.12             | 0.25             |
| Ulcerative colitis           | 38             | 301          | 8                            | 0.046            | 0.084            |
| Ulcerative colitis (p<1e-10) | 17             | 227          | 7                            | 0.017            | <b>0.049</b>     |

B. Regions of overlap between BEB CMS regions and IBD GWAS regions

| CMS region               | Max CMS score | Ulcerative colitis                    |         | Crohn's disease                      |         | Genes                                                                                                              |
|--------------------------|---------------|---------------------------------------|---------|--------------------------------------|---------|--------------------------------------------------------------------------------------------------------------------|
|                          |               | region                                | p       | region                               | p       |                                                                                                                    |
| chr2:60957829-61241691   | 6.75          | chr2:60760000-61867442 (rs7608910)    | 1.7E-14 | chr2:60770000-61740000 (rs10181042)  | 6.6E-09 | REL, PEX13, PUS10, KIAA1841                                                                                        |
| chr3:48649603-49077789   | 6.46          | chr3:48140000-51770000 (rs9822268)    | 1.6E-17 | chr3:48140000-51770000 (rs9822268)   | 1.5E-16 | CELSR3, NCKIPSD, PRKAR2A, SLC25A20, ARIH2, DALRD3, WDR6, IMPDH2, QRICH1                                            |
| chr3:50628862-50946281   | 4.90          |                                       |         |                                      |         | MAPKAPK3, DOCK3                                                                                                    |
| chr3:49121136-49361236   | 3.87          |                                       |         |                                      |         | USP19, LAMB2, CCDC71, KLHDC8B, LOC646498, CCDC36, C3orf62, USP4                                                    |
| chr3:50159130-50275841   | 3.78          |                                       |         |                                      |         | SEMA3F, GNAT1, SLC38A3, GNAI2                                                                                      |
| chr3:49984343-50140249   | 3.52          |                                       |         |                                      |         | RBM6, RBM5                                                                                                         |
| chr6:31703901-31815903   | 4.92          | chr6:31490696-33008579 (rs9268853)    | 1.4E-55 | chr6:31490000-32980000 (rs1799964)   | 4.0E-11 | BAT2, BAT3, APOM, C6orf47, BAT4, CSNK2B, LY6G5B, LY6G5C, BAT5, LY6G6F, LY6G6D, LY6G6C, C6orf25, DDAH2, CLIC1, MSH5 |
| chr4:123581338-123726077 | 4.02          | chr4:123201764-123784752 (rs17388568) | 9.5E-07 | <i>ns</i>                            |         | IL2                                                                                                                |
| chr1:153198332-153306921 | 3.94          | <i>ns</i>                             |         | chr1:153240000-154390000 (rs3180018) | 1.3E-09 | ZBTB7B, DCST2, DCST1, ADAM15, EFNA4                                                                                |
